# Supplementary material for: Enhancing Bioaccessibility of Plant Protein Using Probiotics: An In Vitro Study
Source: MDPI journal article supplement (doi:10.3390/nu15183905), 2023-09-07
Supplement: s1 [file s1]

## Supplementary Material

### Enhancing bioaccessibility of plant protein by probiotics: an *in vitro* study

Journal:

*Nutrients*

Authors:

Maija Marttinen<sup>1\*</sup>, Mehreen Anjum<sup>1</sup>, Markku T. Saarinen<sup>1</sup>, Ilmari Ahonen<sup>2</sup>, Markus J. Lehtinen<sup>1</sup>, Päivi Nurminen<sup>1</sup>, Arja Laitila<sup>1</sup>

Affiliations:

<sup>1</sup> IFF Health & Bioscience, Danisco Sweeteners Oy, Sokeritehtaantie 20, 02460 Kantvik, Finland;

<sup>2</sup> Vincit Plc, Helsinginkatu 15, 20500 Turku, Finland

\*Corresponding author: maija.marttinen@iff.com

Supplementary table 1. Soluble protein measured at the beginning and after the *in vitro* digestion of soy, pea and whey protein ingredients. Values are mean (standard deviation, SD).

| Treatment    | Baseline (mg)  | After digestion (mg)          | Change, $\Delta$ (mg)         | After digestion, relative to control |
|--------------|----------------|-------------------------------|-------------------------------|--------------------------------------|
| Soy protein  |                |                               |                               |                                      |
| Control      | 430.9 (25.5)   | 428.5 (27.1)                  | -2.4 (3.6)                    | 1.00 (0.06)                          |
| B420         | 395.0 (25.2)   | 714.4 (20.5) <sup>†****</sup> | +319.5 (40.4) <sup>****</sup> | 1.67 (0.05) <sup>****</sup>          |
| BI-04        | 376.1 (53.9)   | 421.0 (65.2)                  | +44.9 (22.2)                  | 0.98 (0.15)                          |
| NCFM         | 430.6 (62.4)   | 473.1 (87.7)                  | +42.5 (27.7)                  | 1.10 (0.20)                          |
| HN001        | 428.9 (40.5)   | 448.2 (61.9)                  | +19.3 (77.2)                  | 1.05 (0.14)                          |
| Lpc-37       | 431.5 (52.7)   | 449.1 (58.6)                  | +17.6 (28.4)                  | 1.05 (0.14)                          |
| Lp-115       | 434.8 (81.2)   | 453.4 (66.7)                  | +18.5 (18.2)                  | 1.06 (0.16)                          |
| LI-23        | 522.0 (74.8)   | 649.4 (90.6) <sup>†***</sup>  | +127.4 (54.7) <sup>**</sup>   | 1.52 (0.21) <sup>**</sup>            |
| Pea protein  |                |                               |                               |                                      |
| Control      | 96.8 (17.8)    | 319.3 (27.3) <sup>†</sup>     | +222.6 (29.3)                 | 1.00 (0.09)                          |
| B420         | 85.5 (9.3)     | 312.4 (44.6) <sup>†</sup>     | +226.9 (52.0)                 | 0.98 (0.14)                          |
| BI-04        | 109.5 (15.4)   | 429.9 (55.5) <sup>†****</sup> | +320.5 (48.2) <sup>*</sup>    | 1.35 (0.17) <sup>**</sup>            |
| NCFM         | 101.3 (25.3)   | 419.1 (14.6) <sup>†***</sup>  | +317.8 (26.8) <sup>a</sup>    | 1.31 (0.05) <sup>**</sup>            |
| HN001        | 85.6 (18.0)    | 322.7 (16.9) <sup>†</sup>     | +237.1 (33.5)                 | 1.01 (0.05)                          |
| Lpc-37       | 94.1 (24.5)    | 355.9 (43.6) <sup>†</sup>     | +261.7 (65.8)                 | 1.11 (0.14)                          |
| Lp-115       | 87.4 (23.9)    | 395.8 (9.1) <sup>†**</sup>    | +308.4 (31.8) <sup>a</sup>    | 1.24 (0.03) <sup>*</sup>             |
| LI-23        | 107.1 (7.0)    | 473.9 (19.0) <sup>†****</sup> | +366.8 (25.7) <sup>**</sup>   | 1.48 (0.06) <sup>****</sup>          |
| Whey protein |                |                               |                               |                                      |
| Control      | 937.9 (70.3)   | 933.8 (96.7)                  | -4.1 (26.7)                   | 1.00 (0.10)                          |
| B420         | 974.5 (74.0)   | 1052 (60.4)                   | +77.2 (33.0)                  | 1.13 (0.06)                          |
| BI-04        | 848.7 (9.1)    | 924.6 (106.5)                 | +75.9 (111.7)                 | 0.99 (0.11)                          |
| NCFM         | 959.7 (124.5)  | 941.1 (111.9)                 | -18.6 (15.2)                  | 1.01 (0.12)                          |
| HN001        | 959.0 (117.6)  | 948.7 (147.2)                 | -10.3 (49.9)                  | 1.02 (0.16)                          |
| Lpc-37       | 1056.3 (138.5) | 1076.1 (112.5)                | +19.9 (33.8)                  | 1.15 (0.12)                          |
| Lp-115       | 978.2 (43.7)   | 960.6 (77.1)                  | -17.5 (41.3)                  | 1.03 (0.08)                          |
| LI-23        | 878.4 (91.1)   | 873.5 (84.6)                  | -4.9 (12.9)                   | 0.94 (0.09)                          |

<sup>†</sup> Significantly different from the baseline;

<sup>\*</sup>  $p < 0.05$ , <sup>\*\*</sup>  $p < 0.01$ , <sup>\*\*\*</sup>  $p < 0.001$ , <sup>\*\*\*\*</sup>  $p < 0.0001$ , significantly different from the control;

<sup>a</sup>  $0.05 \leq p < 0.1$ , a tendency towards a difference from the control.

B420 = *Bifidobacterium animalis* subsp. *lactis* B420; BI-04 = *B. animalis* subsp. *lactis* BI-04; NCFM = *Lactobacillus acidophilus* NCFM; HN001 = *Lacticaseibacillus rhamnosus* HN001; Lpc-37 = *Lacticaseibacillus paracasei* subsp. *paracasei* Lpc-37; Lp-115 = *Lactiplantibacillus plantarum* Lp-115; and LI-23 = *Lactococcus lactis* subsp. *lactis* LI-23.

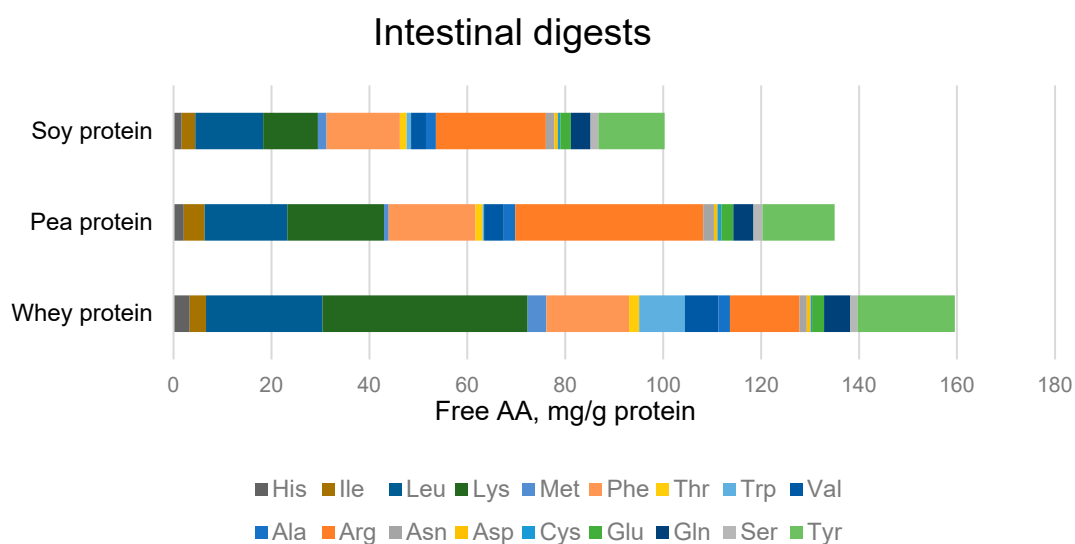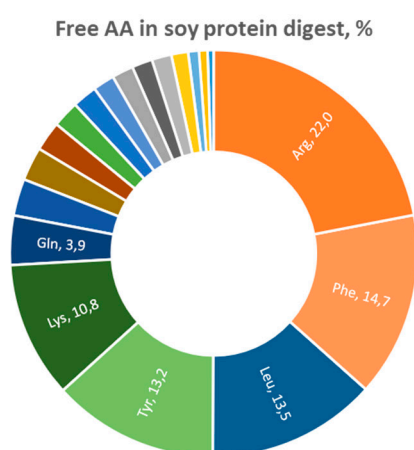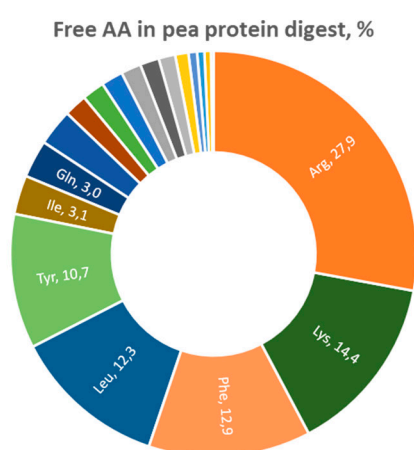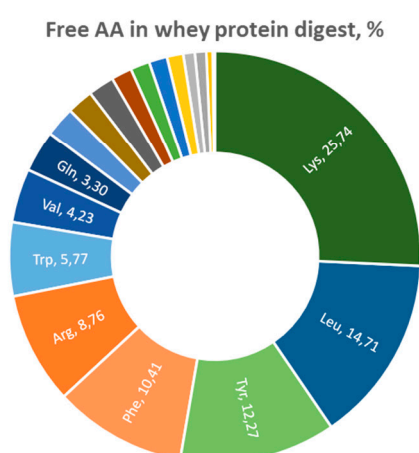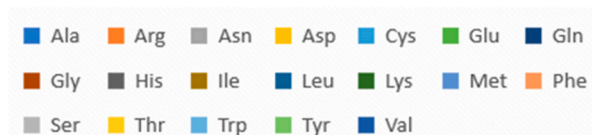

Supplementary figure 1. Profiles of free amino acids (AA) released from whey, soy and pea protein after the *in vitro* digestion. Essential amino acids (EAA): histidine (His), isoleucine (Ile), leucine (Leu), lysine (Lys), methionine (Met), phenylalanine (Phe), threonine (Thr) and valine (Val)

Supplementary table 2. The absolute values of free amino acids at the beginning (baseline) and after the simulated digestion of soy and pea protein by treatment. The table shows mean (mg/g protein) followed by standard deviation in brackets.

| Amino acid    | Treatment | Soy protein                |                                   | Pea protein                |                                   |
|---------------|-----------|----------------------------|-----------------------------------|----------------------------|-----------------------------------|
|               |           | Baseline<br>(mg/g protein) | After digestion<br>(mg/g protein) | Baseline<br>(mg/g protein) | After digestion<br>(mg/g protein) |
| Alanine       | Control   | 0.29 (0.09)                | 2.03 (0.70) ***                   | 0.33 (0.02)                | 2.38 (0.15) ***                   |
|               | B420      | 0.35 (0.00)                | 3.13 (0.21) ***                   | 0.35 (0.01)                | 2.63 (0.02) ***                   |
|               | BI-04     | 0.47 (0.19)                | 2.82 (0.37) ***                   | 0.36 (0.01)                | 2.83 (0.27) ***                   |
|               | NCFM      | 0.47 (0.11)                | 3.53 (0.27) ***                   | 0.40 (0.07)                | 2.60 (0.27) ***                   |
|               | HN001     | 0.43 (0.14)                | 3.38 (0.55) ***                   | 0.45 (0.10)                | 2.65 (0.30) ***                   |
|               | Lpc-37    | 0.41 (0.10)                | 2.92 (0.43) ***                   | 0.49 (0.02)                | 2.80 (0.21) ***                   |
|               | Lp-115    | 0.33 (0.08)                | 2.24 (0.74) ***                   | 0.38 (0.01)                | 2.45 (0.06) ***                   |
|               | LI-23     | 0.35 (0.02)                | 2.88 (0.21) ***                   | 0.42 (0.07)                | 2.73 (0.24) ***                   |
| Arginine      | Control   | 3.46 (0.56)                | 22.45 (5.96) ***                  | 2.10 (0.36)                | 38.36 (1.14) ***                  |
|               | B420      | 3.79 (0.03)                | 27.64 (2.99) ***                  | 2.52 (0.06)                | 39.96 (0.16) ***                  |
|               | BI-04     | 4.36 (0.89)                | 31.16 (8.01) ***                  | 2.28 (0.47)                | 34.88 (10.55) ***                 |
|               | NCFM      | 4.47 (0.53)                | 27.23 (4.38) ***                  | 2.94 (0.49)                | 39.50 (2.21) ***                  |
|               | HN001     | 4.34 (0.66)                | 27.00 (6.06) ***                  | 3.16 (0.88)                | 39.83 (2.64) ***                  |
|               | Lpc-37    | 4.06 (0.44)                | 24.43 (2.25) ***                  | 3.47 (0.53)                | 40.79 (2.18) ***                  |
|               | Lp-115    | 3.60 (0.40)                | 24.66 (3.25) ***                  | 2.66 (0.29)                | 40.27 (2.26) ***                  |
|               | LI-23     | 3.98 (0.24)                | 26.87 (1.86) ***                  | 2.90 (0.44)                | 41.76 (0.77) ***                  |
| Asparagine    | Control   | 0.31 (0.06)                | 1.75 (0.41) ***                   | 0.35 (0.01)                | 2.19 (0.09) ***                   |
|               | B420      | 0.23 (0.02)                | 2.33 (0.30) ***                   | 0.28 (0.02)                | 2.16 (0.21) ***                   |
|               | BI-04     | 0.37 (0.16)                | 2.20 (0.27) ***                   | 0.31 (0.03)                | 2.33 (0.15) ***                   |
|               | NCFM      | 0.42 (0.09)                | 2.92 (0.35) ***                   | 0.39 (0.10)                | 2.36 (0.20) ***                   |
|               | HN001     | 0.38 (0.10)                | 2.76 (0.62) ***                   | 0.48 (0.11)                | 2.47 (0.34) ***                   |
|               | Lpc-37    | 0.37 (0.08)                | 2.28 (0.38) ***                   | 0.53 (0.04)                | 2.61 (0.20) ***                   |
|               | Lp-115    | 0.35 (0.05)                | 1.93 (0.43) ***                   | 0.37 (0.00)                | 2.23 (0.06) ***                   |
|               | LI-23     | 0.30 (0.07)                | 2.15 (0.15) ***                   | 0.44 (0.09)                | 2.52 (0.27) ***                   |
| Aspartic acid | Control   | 0.14 (0.05)                | 0.68 (0.02) ***                   | 0.14 (0.01)                | 0.71 (0.01) ***                   |
|               | B420      | 0.16 (0.00)                | 0.94 (0.05) **                    | 0.15 (0.01)                | 0.74 (0.02) ***                   |
|               | BI-04     | 0.19 (0.04)                | 0.94 (0.03) ***                   | 0.17 (0.04)                | 0.81 (0.15) ***                   |

|               |           | Soy protein                |                                   | Pea protein                |                                   |
|---------------|-----------|----------------------------|-----------------------------------|----------------------------|-----------------------------------|
| Amino acid    | Treatment | Baseline<br>(mg/g protein) | After digestion<br>(mg/g protein) | Baseline<br>(mg/g protein) | After digestion<br>(mg/g protein) |
|               | NCFM      | 0.26 (0.06)                | 1.21 (0.09)                       | 0.19 (0.08)                | 0.88 (0.28) ***                   |
|               | HN001     | 0.24 (0.04)                | 1.12 (0.12)                       | 0.22 (0.09)                | 1.01 (0.35)                       |
|               | Lpc-37    | 0.24 (0.05)                | 1.00 (0.23) ***                   | 0.27 (0.00)                | 1.22 (0.04)                       |
|               | Lp-115    | 0.24 (0.05)                | 1.02 (0.06) **                    | 0.18 (0.05)                | 0.64 (0.30) ***                   |
|               | LI-23     | 0.15 (0.02)                | 0.71 (0.19) ***                   | 0.22 (0.07)                | 0.89 (0.47) ***                   |
| Cystine       | Control   | 0.08 (0.00)                | 0.51 (0.18) ***                   | 0.08 (0.00)                | 0.80 (0.04) ***                   |
|               | B420      | 0.08 (0.00)                | 0.65 (0.03) ***                   | 0.09 (0.00)                | 0.64 (0.05) ***                   |
|               | BI-04     | 0.13 (0.08)                | 0.80 (0.25) ***                   | 0.13 (0.08)                | 0.74 (0.18) ***                   |
|               | NCFM      | 0.08 (0.00)                | 0.89 (0.09) *                     | 0.16 (0.07)                | 0.83 (0.22) ***                   |
|               | HN001     | 0.08 (0.00)                | 0.89 (0.08) *                     | 0.18 (0.09)                | 1.02 (0.23) *                     |
|               | Lpc-37    | 0.12 (0.08)                | 0.84 (0.21) ***                   | 0.24 (0.00)                | 1.17 (0.04)                       |
|               | Lp-115    | 0.12 (0.08)                | 0.52 (0.36) ***                   | 0.17 (0.05)                | 0.89 (0.24) ***                   |
|               | LI-23     | 0.08 (0.00)                | 0.62 (0.03) ***                   | 0.17 (0.08)                | 0.96 (0.24) ***                   |
| Glutamic acid | Control   | 0.40 (0.13)                | 2.16 (0.27) ***                   | 0.47 (0.01)                | 2.46 (0.04) ***                   |
|               | B420      | 0.27 (0.00)                | 2.24 (0.14) ***                   | 0.28 (0.02)                | 2.06 (0.06) ***                   |
|               | BI-04     | 0.35 (0.10)                | 2.27 (0.12) ***                   | 0.34 (0.11)                | 2.14 (0.24) ***                   |
|               | NCFM      | 0.55 (0.09)                | 3.00 (0.15) ***                   | 0.45 (0.15)                | 2.57 (0.33) ***                   |
|               | HN001     | 0.51 (0.08)                | 2.79 (0.48) ***                   | 0.55 (0.11)                | 2.76 (0.46) ***                   |
|               | Lpc-37    | 0.50 (0.09)                | 2.52 (0.44) ***                   | 0.61 (0.00)                | 3.03 (0.09) ***                   |
|               | Lp-115    | 0.54 (0.03)                | 2.42 (0.27) ***                   | 0.39 (0.12)                | 1.88 (0.77) ***                   |
|               | LI-23     | 0.38 (0.08)                | 2.23 (0.03) ***                   | 0.53 (0.09)                | 2.40 (1.01) ***                   |
| Glutamine     | Control   | 0.63 (0.24)                | 4.03 (0.68) ***                   | 0.58 (0.03)                | 4.13 (0.30) ***                   |
|               | B420      | 0.82 (0.03)                | 5.84 (0.59) ***                   | 0.62 (0.01)                | 4.77 (0.30) ***                   |
|               | BI-04     | 1.25 (0.72)                | 5.33 (0.65) ***                   | 0.63 (0.02)                | 5.57 (0.91) ***                   |
|               | NCFM      | 1.24 (0.35)                | 7.02 (0.75) ***                   | 0.86 (0.25)                | 4.67 (0.72) ***                   |
|               | HN001     | 1.12 (0.43)                | 6.69 (1.27) ***                   | 1.09 (0.39)                | 4.78 (0.98) ***                   |
|               | Lpc-37    | 1.02 (0.31)                | 6.07 (1.11) ***                   | 1.25 (0.15)                | 5.24 (0.60) ***                   |
|               | Lp-115    | 0.76 (0.27)                | 5.07 (0.76) ***                   | 0.74 (0.03)                | 4.45 (0.10) ***                   |
|               | LI-23     | 0.85 (0.07)                | 5.47 (0.48) ***                   | 0.94 (0.28)                | 5.14 (0.68) ***                   |

|            |           | Soy protein                |                                   | Pea protein                |                                   |
|------------|-----------|----------------------------|-----------------------------------|----------------------------|-----------------------------------|
| Amino acid | Treatment | Baseline<br>(mg/g protein) | After digestion<br>(mg/g protein) | Baseline<br>(mg/g protein) | After digestion<br>(mg/g protein) |
| Glycine    | Control   | 0.16 (0.01)                | 2.39 (0.23) ***                   | 0.16 (0.00)                | 2.50 (0.07) ***                   |
|            | B420      | 0.10 (0.00)                | 2.52 (0.15) ***                   | 0.10 (0.00)                | 2.75 (0.18) ***                   |
|            | BI-04     | 0.13 (0.03)                | 2.43 (0.30) ***                   | 0.12 (0.03)                | 2.45 (0.30) ***                   |
|            | NCFM      | 0.18 (0.06)                | 2.77 (0.02) ***                   | 0.16 (0.05)                | 2.71 (0.16) ***                   |
|            | HN001     | 0.17 (0.05)                | 2.77 (0.22) ***                   | 0.19 (0.04)                | 2.76 (0.13) ***                   |
|            | Lpc-37    | 0.17 (0.05)                | 2.39 (0.39) ***                   | 0.21 (0.01)                | 2.85 (0.02) ***                   |
|            | Lp-115    | 0.19 (0.01)                | 2.27 (0.35) ***                   | 0.15 (0.02)                | 2.51 (0.04) ***                   |
|            | LI-23     | 0.13 (0.02)                | 2.53 (0.11) ***                   | 0.17 (0.05)                | 2.73 (0.21) ***                   |
| Histidine  | Control   | 0.33 (0.03)                | 1.66 (0.27) ***                   | 0.38 (0.01)                | 2.09 (0.08) ***                   |
|            | B420      | 0.24 (0.04)                | 2.28 (0.44) ***                   | 0.30 (0.05)                | 2.10 (0.42) ***                   |
|            | BI-04     | 0.38 (0.18)                | 2.21 (0.43) ***                   | 0.36 (0.06)                | 2.38 (0.14) ***                   |
|            | NCFM      | 0.44 (0.09)                | 2.39 (0.16) ***                   | 0.40 (0.13)                | 2.29 (0.24) ***                   |
|            | HN001     | 0.42 (0.09)                | 2.33 (0.24) ***                   | 0.51 (0.10)                | 2.38 (0.34) ***                   |
|            | Lpc-37    | 0.41 (0.07)                | 2.17 (0.31) ***                   | 0.55 (0.03)                | 2.50 (0.15) ***                   |
|            | Lp-115    | 0.41 (0.02)                | 2.01 (0.29) ***                   | 0.42 (0.04)                | 2.25 (0.10) ***                   |
|            | LI-23     | 0.30 (0.09)                | 1.94 (0.15) ***                   | 0.46 (0.09)                | 2.41 (0.24) ***                   |
| Isoleucine | Control   | 0.24 (0.08)                | 2.79 (1.24) ***                   | 0.32 (0.02)                | 4.26 (0.36) ***                   |
|            | B420      | 0.31 (0.00)                | 5.09 (0.32) ***                   | 0.38 (0.01)                | 4.75 (0.16) ***                   |
|            | BI-04     | 0.47 (0.25)                | 4.76 (0.33) ***                   | 0.38 (0.02)                | 5.07 (0.26) ***                   |
|            | NCFM      | 0.47 (0.13)                | 5.52 (0.43) ***                   | 0.44 (0.08)                | 4.58 (0.58) ***                   |
|            | HN001     | 0.44 (0.17)                | 5.23 (0.94) ***                   | 0.51 (0.15)                | 4.73 (0.77) ***                   |
|            | Lpc-37    | 0.39 (0.10)                | 4.65 (0.77) ***                   | 0.56 (0.07)                | 4.99 (0.54) ***                   |
|            | Lp-115    | 0.31 (0.06)                | 3.46 (1.54) ***                   | 0.40 (0.02)                | 4.53 (0.23) ***                   |
|            | LI-23     | 0.31 (0.01)                | 4.68 (0.34) ***                   | 0.44 (0.08)                | 4.99 (0.34) ***                   |
| Leucine    | Control   | 1.98 (0.86)                | 13.84 (2.32) ***                  | 1.10 (0.09)                | 16.90 (1.04) ***                  |
|            | B420      | 2.48 (0.04)                | 19.64 (1.10) ***                  | 1.28 (0.02)                | 16.82 (0.31) ***                  |
|            | BI-04     | 3.08 (1.09)                | 18.37 (1.24) ***                  | 1.22 (0.18)                | 18.30 (1.42) ***                  |
|            | NCFM      | 3.29 (0.52)                | 20.94 (1.27) ***                  | 1.47 (0.22)                | 17.23 (0.86) ***                  |
|            | HN001     | 3.10 (0.79)                | 20.30 (3.07) ***                  | 1.66 (0.47)                | 18.04 (1.95) ***                  |

|               |           | Soy protein                |                                   | Pea protein                |                                   |
|---------------|-----------|----------------------------|-----------------------------------|----------------------------|-----------------------------------|
| Amino acid    | Treatment | Baseline<br>(mg/g protein) | After digestion<br>(mg/g protein) | Baseline<br>(mg/g protein) | After digestion<br>(mg/g protein) |
|               | Lpc-37    | 2.82 (0.52)                | 18.41 (2.01) ***                  | 1.79 (0.29)                | 18.54 (1.56) ***                  |
|               | Lp-115    | 2.04 (0.78)                | 15.68 (3.39) ***                  | 1.33 (0.03)                | 17.80 (1.13) ***                  |
|               | LI-23     | 2.64 (0.22)                | 18.98 (1.27) ***                  | 1.47 (0.21)                | 19.12 (0.65) ***                  |
| Lysine        | Control   | 1.67 (0.54)                | 11.21 (2.76) ***                  | 0.80 (0.10)                | 19.74 (0.91) ***                  |
|               | B420      | 1.95 (0.07)                | 14.80 (2.15) ***                  | 0.82 (0.03)                | 19.98 (0.37) ***                  |
|               | BI-04     | 2.28 (0.50)                | 16.29 (3.60) ***                  | 0.81 (0.06)                | 17.60 (4.59) ***                  |
|               | NCFM      | 2.32 (0.26)                | 15.08 (1.95) ***                  | 1.08 (0.20)                | 20.18 (1.05) ***                  |
|               | HN001     | 2.23 (0.34)                | 15.04 (3.36) ***                  | 1.22 (0.34)                | 20.65 (1.53) ***                  |
|               | Lpc-37    | 2.12 (0.22)                | 13.57 (1.51) ***                  | 1.36 (0.15)                | 21.29 (1.26) ***                  |
|               | Lp-115    | 1.75 (0.47)                | 12.35 (2.02) ***                  | 0.97 (0.11)                | 20.40 (1.10) ***                  |
|               | LI-23     | 2.06 (0.15)                | 14.64 (1.41) ***                  | 1.09 (0.22)                | 21.47 (0.83) ***                  |
| Methionine    | Control   | 0.29 (0.09)                | 1.75 (0.23) ***                   | 0.09 (0.00)                | 0.94 (0.03) **                    |
|               | B420      | 0.32 (0.00)                | 2.43 (0.15) ***                   | 0.09 (0.00)                | 0.94 (0.04) **                    |
|               | BI-04     | 0.44 (0.13)                | 1.96 (0.61) ***                   | 0.13 (0.06)                | 1.51 (0.93)                       |
|               | NCFM      | 0.48 (0.10)                | 2.64 (0.20) ***                   | 0.13 (0.07)                | 1.09 (0.17)                       |
|               | HN001     | 0.45 (0.11)                | 2.59 (0.33) ***                   | 0.16 (0.07)                | 1.20 (0.27)                       |
|               | Lpc-37    | 0.43 (0.08)                | 2.37 (0.31) ***                   | 0.20 (0.00)                | 1.32 (0.08) *                     |
|               | Lp-115    | 0.36 (0.09)                | 2.19 (0.28) ***                   | 0.12 (0.06)                | 1.09 (0.12)                       |
|               | LI-23     | 0.36 (0.04)                | 2.28 (0.12) ***                   | 0.16 (0.06)                | 1.17 (0.20)                       |
| Phenylalanine | Control   | 2.12 (0.59)                | 14.97 (1.28) ***                  | 1.02 (0.07)                | 17.74 (0.61) ***                  |
|               | B420      | 2.49 (0.03)                | 19.25 (0.79) ***                  | 1.14 (0.02)                | 17.60 (0.21) ***                  |
|               | BI-04     | 3.12 (1.17)                | 18.40 (0.82) ***                  | 1.10 (0.13)                | 18.57 (0.77) ***                  |
|               | NCFM      | 3.00 (0.34)                | 19.51 (1.04) ***                  | 1.30 (0.16)                | 17.66 (0.75) ***                  |
|               | HN001     | 2.90 (0.57)                | 19.18 (2.34) ***                  | 1.44 (0.36)                | 18.37 (1.54) ***                  |
|               | Lpc-37    | 2.63 (0.33)                | 17.76 (1.43) ***                  | 1.54 (0.23)                | 18.72 (1.39) ***                  |
|               | Lp-115    | 2.16 (0.47)                | 16.17 (1.96) ***                  | 1.23 (0.02)                | 18.59 (1.24) ***                  |
|               | LI-23     | 2.62 (0.18)                | 18.76 (1.13) ***                  | 1.30 (0.14)                | 19.38 (0.48) ***                  |
| Serine        | Control   | 0.29 (0.07)                | 1.60 (0.33) ***                   | 0.28 (0.01)                | 1.81 (0.08) ***                   |
|               | B420      | 0.24 (0.00)                | 2.03 (0.17) ***                   | 0.20 (0.01)                | 1.71 (0.06) ***                   |

|            |           | Soy protein                |                                   | Pea protein                |                                   |
|------------|-----------|----------------------------|-----------------------------------|----------------------------|-----------------------------------|
| Amino acid | Treatment | Baseline<br>(mg/g protein) | After digestion<br>(mg/g protein) | Baseline<br>(mg/g protein) | After digestion<br>(mg/g protein) |
|            | BI-04     | 0.34 (0.10)                | 1.88 (0.15) ***                   | 0.23 (0.04)                | 1.83 (0.20) ***                   |
|            | NCFM      | 0.39 (0.09)                | 2.45 (0.23) ***                   | 0.28 (0.07)                | 1.86 (0.14) ***                   |
|            | HN001     | 0.36 (0.10)                | 2.38 (0.38) ***                   | 0.34 (0.08)                | 1.98 (0.22) ***                   |
|            | Lpc-37    | 0.35 (0.08)                | 1.99 (0.30) ***                   | 0.37 (0.01)                | 2.10 (0.09) ***                   |
|            | Lp-115    | 0.32 (0.06)                | 1.72 (0.35) ***                   | 0.27 (0.02)                | 1.71 (0.05) ***                   |
|            | LI-23     | 0.29 (0.04)                | 1.89 (0.09) ***                   | 0.31 (0.06)                | 1.98 (0.26) ***                   |
| Threonine  | Control   | 0.24 (0.07)                | 1.37 (0.32) *                     | 0.23 (0.01)                | 1.45 (0.06) ***                   |
|            | B420      | 0.22 (0.01)                | 2.02 (0.22) ***                   | 0.17 (0.00)                | 1.48 (0.08) ***                   |
|            | BI-04     | 0.33 (0.10)                | 1.79 (0.21) ***                   | 0.22 (0.07)                | 1.74 (0.35) ***                   |
|            | NCFM      | 0.35 (0.07)                | 2.35 (0.22) ***                   | 0.24 (0.06)                | 1.57 (0.16) ***                   |
|            | HN001     | 0.35 (0.07)                | 2.27 (0.34) ***                   | 0.29 (0.05)                | 1.69 (0.28) ***                   |
|            | Lpc-37    | 0.34 (0.05)                | 1.93 (0.36) ***                   | 0.32 (0.01)                | 1.78 (0.15) ***                   |
|            | Lp-115    | 0.31 (0.06)                | 1.64 (0.32) ***                   | 0.26 (0.04)                | 1.51 (0.12) ***                   |
|            | LI-23     | 0.26 (0.04)                | 1.82 (0.12) ***                   | 0.27 (0.05)                | 1.65 (0.25) ***                   |
| Tryptophan | Control   | 0.08 (0.00)                | 0.90 (0.55)                       | 0.08 (0.00)                | 0.30 (0.00) ***                   |
|            | B420      | 0.23 (0.13)                | 2.46 (1.87) ***                   | 0.11 (0.03)                | 0.82 (0.45)                       |
|            | BI-04     | 0.32 (0.26)                | 1.63 (1.66) *                     | 0.16 (0.05)                | 1.65 (0.95)                       |
|            | NCFM      | 0.22 (0.13)                | 1.92 (0.98) ***                   | 0.08 (0.00)                | 0.56 (0.45)***                    |
|            | HN001     | 0.28 (0.06)                | 2.27 (0.65) ***                   | 0.11 (0.06)                | 0.44 (0.24) ***                   |
|            | Lpc-37    | 0.27 (0.07)                | 2.05 (0.66) ***                   | 0.11 (0.06)                | 0.44 (0.24) ***                   |
|            | Lp-115    | 0.23 (0.01)                | 1.44 (0.44) **                    | 0.13 (0.09)                | 0.80 (0.50) ***                   |
|            | LI-23     | 0.11 (0.06)                | 1.14 (0.73) ***                   | 0.09 (0.02)                | 0.49 (0.23) ***                   |
| Tyrosine   | Control   | 1.80 (0.39)                | 13.53 (1.87) ***                  | 1.06 (0.08)                | 14.75 (0.57) ***                  |
|            | B420      | 2.09 (0.04)                | 18.45 (0.80) ***                  | 1.16 (0.01)                | 15.37 (0.17) ***                  |
|            | BI-04     | 2.67 (1.08)                | 16.84 (1.53) ***                  | 1.15 (0.09)                | 16.73 (1.35) ***                  |
|            | NCFM      | 2.48 (0.26)                | 18.43 (1.15) ***                  | 1.29 (0.14)                | 14.99 (0.91) ***                  |
|            | HN001     | 2.41 (0.44)                | 18.09 (2.35) ***                  | 1.39 (0.27)                | 15.34 (1.26) ***                  |
|            | Lpc-37    | 2.19 (0.26)                | 16.70 (1.34) ***                  | 1.48 (0.17)                | 15.55 (1.15) ***                  |
|            | Lp-115    | 1.82 (0.28)                | 14.46 (2.33) ***                  | 1.27 (0.02)                | 15.43 (0.92) ***                  |



|            |           | Soy protein                |                                   | Pea protein                |                                   |
|------------|-----------|----------------------------|-----------------------------------|----------------------------|-----------------------------------|
| Amino acid | Treatment | Baseline<br>(mg/g protein) | After digestion<br>(mg/g protein) | Baseline<br>(mg/g protein) | After digestion<br>(mg/g protein) |
| Valine     | LI-23     | 2.19 (0.15)                | 17.75 (1.00) ***                  | 1.30 (0.10)                | 16.05 (0.42) ***                  |
|            | Control   | 0.35 (0.11)                | 3.06 (1.31) ***                   | 0.33 (0.01)                | 4.01 (0.31) ***                   |
|            | B420      | 0.43 (0.01)                | 5.54 (0.36) ***                   | 0.37 (0.01)                | 4.53 (0.17) ***                   |
|            | BI-04     | 0.64 (0.33)                | 4.99 (0.52) ***                   | 0.39 (0.01)                | 5.09 (0.56) ***                   |
|            | NCFM      | 0.68 (0.19)                | 5.93 (0.41) ***                   | 0.48 (0.13)                | 4.48 (0.51) ***                   |
|            | HN001     | 0.61 (0.24)                | 5.65 (0.97) ***                   | 0.59 (0.20)                | 4.57 (0.67) ***                   |
|            | Lpc-37    | 0.56 (0.16)                | 5.14 (0.87) ***                   | 0.67 (0.08)                | 4.79 (0.43) ***                   |
|            | Lp-115    | 0.42 (0.10)                | 3.78 (1.67) ***                   | 0.43 (0.03)                | 4.26 (0.12) ***                   |
|            | LI-23     | 0.44 (0.03)                | 5.05 (0.36) ***                   | 0.51 (0.14)                | 4.73 (0.43) ***                   |
| Total EAA  | Control   | 7.30 (2.36)                | 51.56 (9.33) ***                  | 4.35 (0.30)                | 67.43 (3.24) ***                  |
|            | B420      | 8.66 (0.33)                | 73.52 (7.29) ***                  | 4.66 (0.06)                | 69.02 (1.57) ***                  |
|            | BI-04     | 11.07 (3.93)               | 70.40 (6.97) ***                  | 4.76 (0.16)                | 71.91 (2.48) ***                  |
|            | NCFM      | 11.25 (1.59)               | 76.27 (5.55) ***                  | 5.61 (0.91)                | 69.63 (4.50) ***                  |
|            | HN001     | 10.79 (2.31)               | 74.86 (10.84) ***                 | 6.49 (1.77)                | 72.06 (7.53) ***                  |
|            | Lpc-37    | 9.97 (1.42)                | 68.05 (5.03) ***                  | 7.11 (0.91)                | 74.38 (5.75) ***                  |
|            | Lp-115    | 7.99 (2.06)                | 58.71 (10.86) ***                 | 5.29 (0.24)                | 71.23 (2.87) ***                  |
|            | LI-23     | 9.11 (0.76)                | 69.28 (4.77) ***                  | 5.79 (0.95)                | 75.41 (2.57) ***                  |
| Total BCAA | Control   | 2.57 (1.05)                | 19.69 (4.83) ***                  | 1.76 (0.12)                | 25.17 (1.69) ***                  |
|            | B420      | 3.22 (0.06)                | 30.28 (1.77) ***                  | 2.03 (0.04)                | 26.09 (0.61) ***                  |
|            | BI-04     | 4.20 (1.67)                | 28.12 (2.04) ***                  | 1.99 (0.19)                | 28.45 (2.17) ***                  |
|            | NCFM      | 4.44 (0.84)                | 32.40 (2.10) ***                  | 2.39 (0.42)                | 26.29 (1.91) ***                  |
|            | HN001     | 4.15 (1.20)                | 31.18 (4.98) ***                  | 2.76 (0.81)                | 27.34 (3.39) ***                  |
|            | Lpc-37    | 3.77 (0.77)                | 28.20 (3.64) ***                  | 3.03 (0.44)                | 28.32 (2.54) ***                  |
|            | Lp-115    | 2.78 (0.94)                | 22.92 (6.59) ***                  | 2.16 (0.01)                | 26.59 (1.45) ***                  |
|            | LI-23     | 3.39 (0.26)                | 28.71 (1.91) ***                  | 2.42 (0.43)                | 28.84 (1.35) ***                  |
| Total AA   | Control   | 14.85 (3.95)               | 102.70 (14.63) ***                | 9.90 (0.78)                | 137.51 (5.29) ***                 |
|            | B420      | 16.80 (0.45)               | 139.28 (12.68) ***                | 10.40 (0.13)               | 141.80 (2.03) ***                 |
|            | BI-04     | 21.32 (6.92)               | 137.07 (13.25) ***                | 10.49 (0.41)               | 142.20 (9.06) ***                 |
|            | NCFM      | 21.78 (3.18)               | 145.73 (12.33) ***                | 12.74 (2.05)               | 142.60 (9.44) ***                 |

|            |           | Soy protein                |                                   | Pea protein                |                                   |
|------------|-----------|----------------------------|-----------------------------------|----------------------------|-----------------------------------|
| Amino acid | Treatment | Baseline<br>(mg/g protein) | After digestion<br>(mg/g protein) | Baseline<br>(mg/g protein) | After digestion<br>(mg/g protein) |
|            | HN001     | 20.82 (4.34)               | 142.74 (22.46) ***                | 14.55 (3.89)               | 146.67 (14.40) ***                |
|            | Lpc-37    | 19.40 (2.79)               | 129.19 (9.16) ***                 | 16.04 (1.82)               | 151.73 (10.28) ***                |
|            | Lp-115    | 16.26 (3.32)               | 115.02 (13.97) ***                | 11.87 (0.58)               | 143.70 (5.17) ***                 |
|            | LI-23     | 17.79 (1.41)               | 132.37 (8.17) ***                 | 13.19 (2.18)               | 152.57 (5.66) ***                 |

\* $p < 0.05$ , \*\* $p < 0.01$ , and \*\*\* $p < 0.001$ , significant difference in terms of absolute change in amino acid concentration from baseline to after digestion within treatment. The data were log-transformed and analyzed using a robust linear model that is not affected by the heavy-tailed distribution of the data (outliers).  $p$ -values are corrected for false discovery rate (FDR) using Benjamini-Hochberg method.

B420 = *Bifidobacterium animalis* subsp. *lactis* B420; BI-04 = *B. animalis* subsp. *lactis* BI-04; NCFM = *Lactobacillus acidophilus* NCFM; HN001 = *Lacticaseibacillus rhamnosus* HN001; Lpc-37 = *Lacticaseibacillus paracasei* subsp. *paracasei* Lpc-37; Lp-115 = *Lactiplantibacillus plantarum* Lp-115; and LI-23 = *Lactococcus lactis* subsp. *lactis* LI-23.

Supplementary table 3. Comparison of probiotic **soy protein** digests to control digests in terms of absolute change in free amino acid content in the soluble phase from baseline to after digestion. The comparisons are reported as ratios against the control treatment where a ratio of 1.0 denotes no difference, ratio < 1 less than control and ratio > 1 higher than control. Standard error of the estimate is reported in parentheses.

| Amino acid                 | B420            | BI-04          | NCFM            | HN001           | Lpc-37          | Lp-115          | LI-23          |
|----------------------------|-----------------|----------------|-----------------|-----------------|-----------------|-----------------|----------------|
| Alanine                    | 1.42 (0.16) **  | 1.20 (0.14)    | 1.55 (0.18) *** | 1.55 (0.18) *** | 1.30 (0.15) *   | 1.10 (0.13)     | 1.29 (0.15) *  |
| Arginine                   | 1.13 (0.13)     | 1.12 (0.13)    | 1.09 (0.12)     | 1.08 (0.12)     | 0.96 (0.11)     | 1.02 (0.12)     | 1.08 (0.12)    |
| Asparagine                 | 1.37 (0.16) *   | 1.18 (0.14)    | 1.61 (0.18) *** | 1.64 (0.19) *** | 1.24 (0.14)     | 1.09 (0.12)     | 1.20 (0.14)    |
| Aspartic acid              | 1.43 (0.16) **  | 1.39 (0.16) ** | 1.76 (0.20) *** | 1.62 (0.18) *** | 1.34 (0.15) *   | 1.44 (0.17) **  | 0.91 (0.10)    |
| Cystine                    | 1.14 (0.13)     | 1.23 (0.14)    | 1.63 (0.19) *** | 1.64 (0.19) *** | 1.43 (0.16) **  | 0.46 (0.05) *** | 1.08 (0.12)    |
| Glutamic acid              | 1.12 (0.13)     | 1.09 (0.12)    | 1.40 (0.16) **  | 1.36 (0.16) *   | 1.11 (0.13)     | 1.07 (0.12)     | 1.06 (0.12)    |
| Glutamine                  | 1.51 (0.17) **  | 1.23 (0.14)    | 1.74 (0.20) *** | 1.72 (0.20) *** | 1.57 (0.18) *** | 1.30 (0.15) *   | 1.39 (0.16) ** |
| Glycine                    | 1.09 (0.12)     | 1.05 (0.12)    | 1.16 (0.13)     | 1.17 (0.13)     | 1.00 (0.11)     | 0.95 (0.11)     | 1.08 (0.12)    |
| Histidine <sup>a</sup>     | 1.55 (0.18) *** | 1.35 (0.15) *  | 1.42 (0.16) **  | 1.39 (0.16) **  | 1.30 (0.15) *   | 1.20 (0.14)     | 1.19 (0.14)    |
| Isoleucine <sup>a,b</sup>  | 1.66 (0.19) *** | 1.49 (0.17) ** | 1.75 (0.20) *** | 1.69 (0.19) *** | 1.52 (0.17) **  | 1.24 (0.14)     | 1.51 (0.17) ** |
| Leucine <sup>a,b</sup>     | 1.46 (0.17) **  | 1.30 (0.15) *  | 1.50 (0.17) **  | 1.47 (0.17) **  | 1.33 (0.15) *   | 1.16 (0.13)     | 1.39 (0.16) ** |
| Lysine <sup>a</sup>        | 1.40 (0.16) **  | 1.42 (0.16) ** | 1.38 (0.16) **  | 1.42 (0.16) **  | 1.22 (0.14)     | 1.09 (0.12)     | 1.33 (0.15) *  |
| Methionine <sup>a</sup>    | 1.44 (0.16) **  | 1.18 (0.13)    | 1.48 (0.17) **  | 1.46 (0.17) **  | 1.33 (0.15) *   | 1.24 (0.14)     | 1.32 (0.15) *  |
| Phenylalanine <sup>a</sup> | 1.31 (0.15) *   | 1.19 (0.14)    | 1.29 (0.15) *   | 1.26 (0.14)     | 1.18 (0.13)     | 1.09 (0.12)     | 1.26 (0.14)    |
| Serine                     | 1.30 (0.15) *   | 1.13 (0.13)    | 1.48 (0.17) **  | 1.49 (0.17) **  | 1.19 (0.14)     | 1.07 (0.12)     | 1.17 (0.13)    |
| Threonine <sup>a</sup>     | 1.50 (0.17) **  | 1.23 (0.14)    | 1.67 (0.19) *** | 1.66 (0.19) *** | 1.39 (0.16) **  | 1.16 (0.13)     | 1.31 (0.15) *  |
| Tryptophan <sup>a</sup>    | 3.17 (0.38) *** | 0.85 (0.10)    | 1.55 (0.18) **  | 2.30 (0.27) *** | 2.07 (0.25) *** | 1.34 (0.16) *   | 1.39 (0.17) *  |
| Tyrosine                   | 1.41 (0.16) **  | 1.22 (0.14)    | 1.37 (0.16) *   | 1.34 (0.15) *   | 1.24 (0.14)     | 1.11 (0.13)     | 1.34 (0.15) *  |
| Valine <sup>a,b</sup>      | 1.70 (0.19) *** | 1.44 (0.16) ** | 1.75 (0.20) *** | 1.69 (0.19) *** | 1.56 (0.18) *** | 1.27 (0.15)     | 1.53 (0.17) ** |
| total EAA <sup>a</sup>     | 1.51 (0.17) **  | 1.39 (0.16) ** | 1.52 (0.17) **  | 1.51 (0.17) **  | 1.36 (0.16) *   | 1.22 (0.14)     | 1.41 (0.16) ** |
| total BCAA <sup>b</sup>    | 1.56 (0.18) *** | 1.38 (0.16) ** | 1.61 (0.18) *** | 1.57 (0.18) *** | 1.42 (0.16) **  | 1.22 (0.14)     | 1.46 (0.17) ** |
| Total AA                   | 1.42 (0.16) **  | 1.34 (0.15) *  | 1.43 (0.16) **  | 1.43 (0.16) **  | 1.27 (0.15)     | 1.14 (0.13)     | 1.33 (0.15) *  |

<sup>a</sup> EAA, essential amino acid; <sup>b</sup> BCAA, branched chain amino acid. Statistically significant different to control digestion without probiotic; \*  $p < 0.05$ , \*\*  $p < 0.01$ , \*\*\*  $p < 0.001$ .

B420 = *Bifidobacterium animalis* subsp. *lactis* B420; BI-04 = *B. animalis* subsp. *lactis* BI-04; NCFM = *Lactobacillus acidophilus* NCFM; HN001 = *Lacticaseibacillus rhamnosus* HN001; Lpc-37 = *Lacticaseibacillus paracasei* subsp. *paracasei* Lpc-37; Lp-115 = *Lactiplantibacillus plantarum* Lp-115; and LI-23 = *Lactococcus lactis* subsp. *lactis* LI-23.

Supplementary table 4. Comparison of probiotic **pea protein** digests to control digests in terms of absolute change in free amino acid content from baseline to after digestion. The comparisons are reported as ratios against the control treatment where a ratio of 1.0 denotes no difference, ratio < 1 less than control and ratio > 1 higher than control. Standard error of the estimate is reported in parentheses.

| Amino acid                 | B420            | BI-04           | NCFM        | HN001           | Lpc-37          | Lp-115          | LI-23           |
|----------------------------|-----------------|-----------------|-------------|-----------------|-----------------|-----------------|-----------------|
| Alanine                    | 1.11 (0.08)     | 1.18 (0.09)     | 1.05 (0.08) | 1.07 (0.08)     | 1.13 (0.08)     | 1.01 (0.08)     | 1.12 (0.08)     |
| Arginine                   | 1.03 (0.08)     | 1.02 (0.08)     | 1.01 (0.08) | 1.01 (0.08)     | 1.03 (0.08)     | 1.04 (0.08)     | 1.07 (0.07)     |
| Asparagine                 | 1.04 (0.08)     | 1.10 (0.08)     | 1.07 (0.08) | 1.09 (0.08)     | 1.14 (0.08)     | 1.01 (0.08)     | 1.13 (0.08)     |
| Aspartic acid              | 1.04 (0.08)     | 1.11 (0.08)     | 1.24 (0.09) | 1.59 (0.12) *** | 1.67 (0.12) *** | 0.88 (0.07)     | 0.97 (0.07)     |
| Cystine                    | 0.76 (0.06) **  | 0.85 (0.06)     | 0.89 (0.07) | 1.23 (0.09)     | 1.30 (0.10) *   | 0.90 (0.07)     | 1.08 (0.08)     |
| Glutamic acid              | 0.90 (0.07)     | 0.92 (0.07)     | 1.09 (0.08) | 1.14 (0.09)     | 1.22 (0.09)     | 0.90 (0.07)     | 1.03 (0.07)     |
| Glutamine                  | 1.17 (0.09)     | 1.36 (0.10) **  | 1.06 (0.08) | 1.03 (0.08)     | 1.16 (0.09)     | 1.05 (0.08)     | 1.17 (0.08)     |
| Glycine                    | 1.13 (0.08)     | 1.03 (0.08)     | 1.09 (0.08) | 1.10 (0.08)     | 1.13 (0.08)     | 1.01 (0.08)     | 1.09 (0.08)     |
| Histidine <sup>a</sup>     | 1.14 (0.08)     | 1.18 (0.09)     | 1.11 (0.08) | 1.11 (0.08)     | 1.14 (0.09)     | 1.07 (0.08)     | 1.14 (0.08)     |
| Isoleucine <sup>a,b</sup>  | 1.12 (0.08)     | 1.20 (0.09)     | 1.07 (0.08) | 1.08 (0.08)     | 1.15 (0.09)     | 1.06 (0.08)     | 1.16 (0.08)     |
| Leucine <sup>a,b</sup>     | 0.98 (0.07)     | 1.07 (0.08)     | 1.00 (0.07) | 1.04 (0.08)     | 1.06 (0.08)     | 1.04 (0.08)     | 1.12 (0.08)     |
| Lysine <sup>a</sup>        | 1.01 (0.08)     | 0.98 (0.07)     | 1.01 (0.08) | 1.03 (0.08)     | 1.05 (0.08)     | 1.03 (0.08)     | 1.08 (0.08)     |
| Methionine <sup>a</sup>    | 1.00 (0.07)     | 1.08 (0.08)     | 1.16 (0.09) | 1.26 (0.09) *   | 1.31 (0.10) **  | 1.14 (0.09)     | 1.19 (0.08)     |
| Phenylalanine <sup>a</sup> | 0.98 (0.07)     | 1.04 (0.08)     | 0.98 (0.07) | 1.01 (0.08)     | 1.03 (0.08)     | 1.04 (0.08)     | 1.08 (0.08)     |
| Serine                     | 0.99 (0.07)     | 1.06 (0.08)     | 1.03 (0.08) | 1.07 (0.08)     | 1.13 (0.08)     | 0.94 (0.07)     | 1.10 (0.08)     |
| Threonine <sup>a</sup>     | 1.06 (0.08)     | 1.20 (0.09)     | 1.10 (0.08) | 1.14 (0.09)     | 1.18 (0.09)     | 1.02 (0.08)     | 1.12 (0.08)     |
| Tryptophan <sup>a</sup>    | 4.04 (0.31) *** | 4.56 (0.35) *** | 1.04 (0.08) | 1.04 (0.08)     | 1.04 (0.08)     | 3.12 (0.24) *** | 1.61 (0.12) *** |
| Tyrosine                   | 1.04 (0.08)     | 1.13 (0.08)     | 1.00 (0.07) | 1.02 (0.08)     | 1.03 (0.08)     | 1.03 (0.08)     | 1.08 (0.08)     |
| Valine <sup>a,b</sup>      | 1.13 (0.08)     | 1.25 (0.09)     | 1.08 (0.08) | 1.08 (0.08)     | 1.13 (0.08)     | 1.04 (0.08)     | 1.15 (0.08)     |
| Total EAA <sup>a</sup>     | 1.02 (0.08)     | 1.06 (0.08)     | 1.01 (0.08) | 1.04 (0.08)     | 1.07 (0.08)     | 1.05 (0.08)     | 1.10 (0.08)     |
| Total BCAA <sup>b</sup>    | 1.03 (0.08)     | 1.12 (0.08)     | 1.02 (0.08) | 1.05 (0.08)     | 1.09 (0.08)     | 1.04 (0.08)     | 1.13 (0.08)     |
| Total AA                   | 1.03 (0.08)     | 1.03 (0.08)     | 1.02 (0.08) | 1.03 (0.08)     | 1.06 (0.08)     | 1.03 (0.08)     | 1.09 (0.08)     |

<sup>a</sup> EAA, essential amino acid; <sup>b</sup> BCAA, branched chain amino acid. Statistically significant different to control digestion without probiotic; \* $p < 0.05$ , \*\* $p < 0.01$ , \*\*\* $p < 0.001$ .

B420 = *Bifidobacterium animalis* subsp. *lactis* B420; BI-04 = *B. animalis* subsp. *lactis* BI-04; NCFM = *Lactobacillus acidophilus* NCFM; HN001 = *Lacticaseibacillus rhamnosus* HN001; Lpc-37 = *Lacticaseibacillus paracasei* subsp. *paracasei* Lpc-37; Lp-115 = *Lactiplantibacillus plantarum* Lp-115; and LI-23 = *Lactococcus lactis* subsp. *lactis* LI-23.

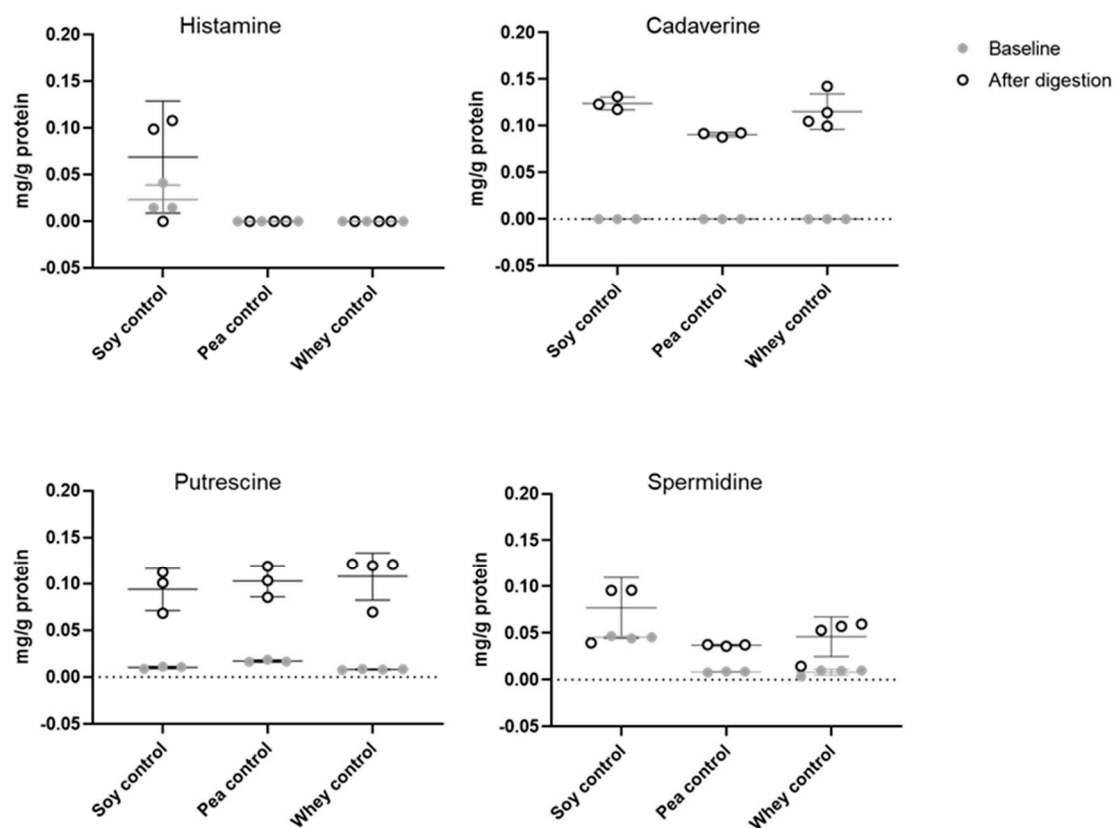

Supplementary figure 2. Concentration of biogenic amines (mg/g protein) in samples collected at the beginning and after the *in vitro* digestion of soy, pea and whey protein.

Supplementary table 5. Probiotic counts as log<sub>10</sub> colony forming units (CFU) at baseline and after *in vitro* digestion of soy, pea and whey protein. Values are mean (standard deviation, SD).

| Treatment    | Baseline<br>(log <sub>10</sub> CFU) | After digestion<br>(log <sub>10</sub> CFU) | Change, Δ<br>(log <sub>10</sub> CFU) |
|--------------|-------------------------------------|--------------------------------------------|--------------------------------------|
| Soy protein  |                                     |                                            |                                      |
| B420         | 8.6 (0.19)                          | 8.3 (0.19)                                 | -0.30 (0.02)                         |
| BI-04        | 8.9 (0.21)                          | 8.5 (0.18)                                 | -0.33 (0.03)                         |
| NCFM         | 8.6 (0.08)                          | 5.5 (0.07)                                 | -3.1 (0.04)                          |
| HN001        | 8.8 (0.08)                          | 5.6 (0.15)                                 | -3.2 (0.07)                          |
| Lpc-37       | 8.8 (0.28)                          | 5.3 (0.16)                                 | -3.5 (0.32)                          |
| Lp-115       | 9.0 (0.14)                          | 6.4 (0.18)                                 | -2.6 (0.16)                          |
| LI-23        | 9.0 (0.06)                          | 4.5 (0.06)                                 | -4.5 (0.02)                          |
| Pea protein  |                                     |                                            |                                      |
| B420         | 8.8 (0.20)                          | 8.5 (0.14)                                 | -0.27 (0.08)                         |
| BI-04        | 8.9 (0.09)                          | 8.7 (0.10)                                 | -0.29 (0.03)                         |
| NCFM         | 8.1 (0.10)                          | 5.4 (0.07)                                 | -2.6 (0.08)                          |
| HN001        | 8.8 (0.32)                          | 5.6 (0.11)                                 | -3.2 (0.26)                          |
| Lpc-37       | 8.8 (0.11)                          | 4.8 (0.09)                                 | -4.0 (0.10)                          |
| Lp-115       | 8.8 (0.25)                          | 6.2 (0.42)                                 | -2.7 (0.18)                          |
| LI-23        | 8.5 (0.36)                          | 5.4 (0.27)                                 | -3.1 (0.16)                          |
| Whey protein |                                     |                                            |                                      |
| B420         | 8.7 (0.23)                          | 8.3 (0.19)                                 | -0.35 (0.05)                         |
| BI-04        | 8.6 (0.00)                          | 7.7 (0.06)                                 | -0.86 (0.06)                         |
| NCFM         | 8.4 (0.16)                          | 4.3 (0.09)                                 | -4.1 (0.15)                          |
| HN001        | 8.6 (0.01)                          | 4.7 (0.24)                                 | -3.9 (0.25)                          |
| Lpc-37       | 8.7 (0.22)                          | 4.3 (0.17)                                 | -4.4 (0.06)                          |
| Lp-115       | 8.8 (0.12)                          | 4.6 (0.12)                                 | -4.2 (0.11)                          |
| LI-23        | 8.7 (0.09)                          | 0.0 (0.0)                                  | -8.7 (0.09)                          |

B420 = *Bifidobacterium animalis* subsp. *lactis* B420; BI-04 = *B. animalis* subsp. *lactis* BI-04; NCFM = *Lactobacillus acidophilus* NCFM; HN001 = *Lacticaseibacillus rhamnosus* HN001; Lpc-37 = *Lacticaseibacillus paracasei* subsp. *paracasei* Lpc-37; Lp-115 = *Lactiplantibacillus plantarum* Lp-115; and LI-23 = *Lactococcus lactis* subsp. *lactis* LI-23.
